# Supplementary material
Source: PubMed Central journal article supplement (PMC8316114)
Supplement: aac.02415-20-s000s1.pdf [file aac.02415-20-s000s1.pdf]

## Two functionally redundant FK506-binding proteins regulate multidrug resistance gene expression and govern azole antifungal resistance

Romila Moirangthem<sup>1,2,¶</sup>, Kundan Kumar<sup>1,3,¶</sup> and Rupinder Kaur<sup>1,\*</sup>

<sup>1</sup>Laboratory of Fungal Pathogenesis, Centre for DNA Fingerprinting and Diagnostics, Hyderabad-500039, India.

<sup>2</sup>Present address: Department of Immunology, The Ruth and Bruce Rappaport Faculty of Medicine, Technion-Israel Institute of Technology, Haifa-3525433, Israel.

<sup>3</sup>Graduate studies, Manipal Academy of Higher Education, Manipal-576104, Karnataka, India.

¶R.M. and K.K. contributed equally to the work. Author order was determined based on initiation of the research idea.

\*For correspondence: Rupinder Kaur, Centre for DNA Fingerprinting and Diagnostics (CDFD), Hyderabad, Telangana, India. Tel.: 91-40-27216137; Fax: 91-40-27216006; E-mail: rkaur@cdfd.org.in.

### Supplemental data

#### Supplemental Tables (S1-S6)

**Table S1:** MIC<sub>80</sub> of fluconazole (µg/ml) for *wild-type* and *CgfprΔ* strains.

**Table S2:** MIC<sub>80</sub> of fluconazole (µg/ml) for *Cgrph1Δ* and *Cgset2Δ* mutants.

**Table S3:** List of strains used in the study.

**Table S4:** List of plasmids used in the study.

**Table S5:** List of primers used in the study.

**Table S6:** List of antibodies used in the study.

#### Supplemental Figures (S1-S5)

**Figure S1:** CgFpr3 and CgFpr4 possess peptidyl-prolyl cis-trans isomerase domain.

**Figure S2:** CgFpr3-C<sub>trunc</sub>-GFP and CgFpr4-C<sub>trunc</sub>-GFP proteins are expressed well in the *Cgfpr3ΔΔΔ* mutant.

**Figure S3:** Fluconazole and FK506 combination is not cidal for *Cgfpr3ΔΔΔ* mutant.

**Figure S4:** CgRph1 contains JmjN and JmjC domains at the N-terminus.

**Figure S5:** Serial dilution spotting analysis illustrating susceptibility of *Cgset2Δ* and *Cgrph1Δ* to varied stresses.

**Table S1: MIC<sub>80</sub> of fluconazole (µg/ml) for wild-type and CgfrΔ strains.**

| <b>Strain</b>    | <b>MIC<sub>80</sub> (µg/ml)</b> |
|------------------|---------------------------------|
| <i>wt</i>        | 16                              |
| <i>Cgfr3</i> Δ   | 16                              |
| <i>Cgfr4</i> Δ   | 16                              |
| <i>Cgfr3Δ4</i> Δ | 64                              |

**Table S2: MIC<sub>80</sub> of fluconazole (µg/ml) for *Cgrph1* Δ and *Cgset2* Δ mutants.**

| <b>Strain</b>   | <b>MIC<sub>80</sub> (µg/ml)</b> |
|-----------------|---------------------------------|
| <i>wt</i>       | 16                              |
| <i>Cgrph1</i> Δ | 8                               |
| <i>Cgset2</i> Δ | 32                              |

**Table S3: List of *C. glabrata* strains used in the study.**

| <b>Yeast strain</b> | <b>Genotype</b>                                                  | <b>Reference</b>                  |
|---------------------|------------------------------------------------------------------|-----------------------------------|
| YRK19               | <i>ura3Δ::Tn903 G418R</i> (BG14)                                 | Cormack and Falkow, 1999          |
| YRK20               | <i>URA3</i> (BG462)                                              | De Las Peñas <i>et al.</i> , 2003 |
| YRK1948             | <i>ura3Δ::Tn903 G418R Cgfpr3Δ::nat1</i>                          | This study                        |
| YRK1951             | <i>URA3 Cgfpr3Δ::nat1</i>                                        | This study                        |
| YRK1874             | <i>ura3Δ::Tn903 G418R Cgfpr4Δ::nat1</i>                          | This study                        |
| YRK1877             | <i>URA3 Cgfpr4Δ::nat1</i>                                        | This study                        |
| YRK2015             | <i>ura3Δ::Tn903 G418R Cgfpr3Δ4Δ::nat1</i>                        | This study                        |
| YRK2308             | <i>URA3 Cgfpr3Δ4Δ::nat1</i>                                      | This study                        |
| YRK4188             | <i>URA3 Cgrph1::nat1</i>                                         | This study                        |
| YRK4183             | <i>URA3 Cgset2::nat1</i>                                         | This study                        |
| YRK809              | <i>ura3Δ::Tn903 G418R Cgpd1Δ::nat1</i>                           | Kaur Laboratory                   |
| YRK1503             | <i>URA3 Cgcdr1Δ::nat1</i>                                        | Kaur Laboratory                   |
| YRK4162             | <i>ura3Δ::Tn903 G418R Cgfpr3Δ4Δcdr1Δ::nat1</i>                   | This study                        |
| YRK4180             | <i>ura3Δ::Tn903 G418R Cgfpr3Δ4Δpdr1Δ::nat1</i>                   | This study                        |
| YRK3896             | <i>ura3Δ::Tn903 G418R</i> (YRK19)/pRK2006                        | This study                        |
| YRK3900             | <i>ura3Δ::Tn903 G418R</i> (YRK19)/pRK2010                        | This study                        |
| YRK3934             | <i>ura3Δ::Tn903 G418R Cgfpr3Δ4Δ::nat1</i> (YRK2015)/pRK2006      | This study                        |
| YRK3936             | <i>ura3Δ::Tn903 G418R Cgfpr3Δ4Δ::nat1</i> (YRK2015)/pRK2008      | This study                        |
| YRK3938             | <i>ura3Δ::Tn903 G418R Cgfpr3Δ4Δ::nat1</i> (YRK2015)/pRK2010      | This study                        |
| YRK3940             | <i>ura3Δ::Tn903 G418R Cgfpr3Δ4Δ::nat1</i> (YRK2015)/pRK2012      | This study                        |
| YRK4191             | <i>ura3Δ::Tn903 G418R Cgfpr3Δ4Δcdr1Δ::nat1</i> (YRK4162)/pRK1108 | This study                        |
| YRK4293             | <i>ura3Δ::Tn903 G418R Cgfpr3Δ4Δpdr1Δ::nat1</i> (YRK4180)/pRK945  | This study                        |

**Table S4: List of plasmids used in the study.**

| <b>Plasmid</b> | <b>Description</b>                                                                                    | <b>Reference</b>         |
|----------------|-------------------------------------------------------------------------------------------------------|--------------------------|
| pRK1018        | pGRB2.3 plasmid                                                                                       | Addgene (Plasmid #45343) |
| pRK2006        | <i>CgFPR3</i> (1.314 kb) cloned in <i>XbaI-SpeI</i> sites of pRK1018 plasmid                          | This study               |
| pRK2008        | <i>CgFPR3</i> (1.041 kb) lacking catalytic domain cloned in <i>XbaI-SpeI</i> sites of pRK1018 plasmid | This study               |
| pRK2010        | <i>CgFPR4</i> (1.197 kb) cloned in <i>XbaI-SpeI</i> sites of pRK1018 plasmid                          | This study               |
| pRK2012        | <i>CgFPR4</i> (0.918 kb) lacking catalytic domain cloned in <i>XbaI-SpeI</i> sites of pRK1018 plasmid | This study               |
| pRK1108        | <i>CgCDR1</i> (4.500 kb) cloned in <i>SpeI-XmaI</i> sites of pRK1018 plasmid                          | Kaur Laboratory          |
| pRK945         | pSF4, pCgACU5-derived plasmid containing <i>CgPDR1</i> from wild-type strain                          | Sanglard laboratory      |
| pRK70          | pRD16, <i>C. glabrata</i> CEN/ARS plasmid for expressing <i>S. cerevisiae FLP1</i>                    | Cormack laboratory       |
| pRK625         | NAT cassette cloned in pCR2.1 plasmid                                                                 | Cormack laboratory       |

**Table S5 : List of primers used in the study.**

| Primer                                                                    | Sequence (5'-3')                               | Description                                                         | Restriction enzyme | Reference         |
|---------------------------------------------------------------------------|------------------------------------------------|---------------------------------------------------------------------|--------------------|-------------------|
| <b>For generation of deletion strains</b>                                 |                                                |                                                                     |                    |                   |
| OGRK2312                                                                  | CGATAAACTTCGCGTTAGC                            | <i>CgFPR4</i> _5' UTR Forward                                       |                    |                   |
| OGRK2313                                                                  | gcgtgacctgcagcgtacgTTCAGGAGTAACCTTCCTCC        | <i>CgFPR4</i> _5' UTR Reverse                                       |                    |                   |
| OGRK2314                                                                  | cgacgggtcggctctcgtagCAAAGCTCATTCTAGTTATTGTATGC | <i>CgFPR4</i> _3' UTR Forward                                       |                    |                   |
| OGRK2315                                                                  | GCTCGATAGCCTTGGCAAAT                           | <i>CgFPR4</i> _3' UTR Reverse                                       |                    |                   |
| OGRK2316                                                                  | TGGGAAGTGTGCAAAACAA                            | <i>CgFPR4</i> _5' Integration check Forward                         |                    |                   |
| OGRK2317                                                                  | TCGAACCAACCTCAATTTCC                           | <i>CgFPR4</i> _3' Integration check Reverse                         |                    |                   |
| OGRK2318                                                                  | GCTATTTCCGAGGGTGATGA                           | <i>CgFPR4</i> _Internal check Forward                               |                    |                   |
| OGRK2319                                                                  | TCTACGCTCACCCCAATAG                            | <i>CgFPR4</i> _Internal check Reverse                               |                    |                   |
| OgRK2517                                                                  | GGCTGCTTCTCTCTTTGA                             | <i>CgFPR3</i> _5' UTR Forward                                       |                    |                   |
| OgRK2518                                                                  | gcgtgacctgcagcgtacgCGCCACTAATAACCAACCTCA       | <i>CgFPR3</i> _5' UTR Reverse                                       |                    |                   |
| OgRK2519                                                                  | cgacgggtcggctctcgtagGAACTGCTCTGGCGTTTCATT      | <i>CgFPR3</i> _3' UTR Forward                                       |                    |                   |
| OgRK2520                                                                  | TTGGTGTAGCTTCGTTCTTTCA                         | <i>CgFPR3</i> _3' UTR Reverse                                       |                    |                   |
| OgRK2521                                                                  | CTCCTCCAAGCAAGTCAAGG                           | <i>CgFPR3</i> _5' Integration check Forward                         |                    |                   |
| OgRK2522                                                                  | GGTAGATGCGGCTATTGCAT                           | <i>CgFPR3</i> _3' Integration check Reverse                         |                    |                   |
| OgRK2523                                                                  | TGACATGGACGATAGCGAAG                           | <i>CgFPR3</i> _Internal check Forward                               |                    |                   |
| OgRK2524                                                                  | GACGTCCCATCCCTTGATAA                           | <i>CgFPR3</i> _Internal check Reverse                               |                    |                   |
| OgRK4102                                                                  | CTTACCAGGACATGATGTTG                           | <i>CgRPH1</i> _5' UTR Forward                                       |                    |                   |
| OgRK4103                                                                  | gcgtgacctgcagcgtacgCAGCTCACCCAGTTGGTAT         | <i>CgRPH1</i> _5' UTR Reverse                                       |                    |                   |
| OgRK4104                                                                  | cgacgggtcggctctcgtagGACGAAGGGAGATTGCAAAG       | <i>CgRPH1</i> _3' UTR Forward                                       |                    |                   |
| OgRK4105                                                                  | GCCTGTCTCAGTCTTTGGA                            | <i>CgRPH1</i> _3' UTR Reverse                                       |                    |                   |
| OgRK4106                                                                  | AATCCACCTCGACGTCAAAC                           | <i>CgRPH1</i> _5' Integration check Forward                         |                    |                   |
| OgRK4107                                                                  | CATCATCCTTACCAGCAACT                           | <i>CgRPH1</i> _3' Integration check Reverse                         |                    |                   |
| OgRK4108                                                                  | GTCCTGGTGTGGCTAAAAA                            | <i>CgRPH1</i> _Internal check Forward                               |                    |                   |
| OgRK4109                                                                  | ATAGCCCATGTCAAGCAAC                            | <i>CgRPH1</i> _Internal check Reverse                               |                    |                   |
| OgRK4139                                                                  | GGTGTAAACCCAGCTTCTGCTCATT                      | <i>CgSET2</i> _5' UTR Forward                                       |                    |                   |
| OgRK4140                                                                  | gcgtgacctgcagcgtacgCAGACATGTTATCGAAGGTATG      | <i>CgSET2</i> _5' UTR Reverse                                       |                    |                   |
| OgRK4141                                                                  | cgacgggtcggctctcgtagCTTGCTTGATATTCTGCCATAC     | <i>CgSET2</i> _3' UTR Forward                                       |                    |                   |
| OgRK4142                                                                  | GAGCATGTTGACATGCCAGGACAC                       | <i>CgSET2</i> _3' UTR Reverse                                       |                    |                   |
| OgRK4143                                                                  | GGCTCAATAGGCCATGGGATG                          | <i>CgSET2</i> _5' Integration check Forward                         |                    |                   |
| OgRK4144                                                                  | CATTGGTTCAGTGATCGACCCAG                        | <i>CgSET2</i> _3' Integration check Reverse                         |                    |                   |
| OgRK1724                                                                  | TGTCATCGAATGAGGAGCTG                           | <i>CgSET2</i> _Internal check Forward                               |                    |                   |
| OgRK1725                                                                  | AACAATTTCCCAACCAGGTG                           | <i>CgSET2</i> _Internal check Reverse                               |                    |                   |
| OgRK4063                                                                  | CCTTCGCGTAATAGGACTGC                           | <i>CgCDR1</i> _5' UTR Forward                                       |                    |                   |
| OgRK4064                                                                  | GGTCAAAGGTGTGGCAACT                            | <i>CgCDR1</i> _3' UTR Reverse                                       |                    |                   |
| <b>For gene cloning</b>                                                   |                                                |                                                                     |                    |                   |
| OgRK2525                                                                  | TCGA <u>ACTAGA</u> ATGCTGATATGCTACCA           | <i>CgFPR3</i> _Forward                                              | XbaI               |                   |
| OgRK2527                                                                  | TCGA <u>ACTAGT</u> TTTGATGGACACCAAC            | <i>CgFPR3</i> _Reverse_without stop codon                           | SpeI               |                   |
| OGRK3835                                                                  | TCGA <u>ACTAGT</u> AGCTGGACCATCGCCAACGG        | <i>CgFPR3</i> _Reverse_without stop codon_Catalytic domain deletion | SpeI               |                   |
| OGRK2320                                                                  | ATG <u>CTAGA</u> ATGCTGATATGTTACCG             | <i>CgFPR4</i> _Forward                                              | XbaI               |                   |
| OGRK2322                                                                  | ATG <u>ACTAGT</u> TTTTAGAGAAACTAAC             | <i>CgFPR4</i> _Reverse_without stop codon                           | SpeI               |                   |
| OGRK3837                                                                  | ATG <u>CACTAGT</u> ACCCTCACCTATCTTACGG         | <i>CgFPR4</i> _Reverse_without stop codon_Catalytic domain deletion | SpeI               |                   |
| <b>For qRT-PCR</b>                                                        |                                                |                                                                     |                    |                   |
| OgRK127                                                                   | TGCAGGACCAAGTCAGACAG                           | <i>CgCDR1</i> _Forward                                              |                    | Borah et al.,2011 |
| OgRK128                                                                   | CTCATCGGAAGTAGGGTCCA                           | <i>CgCDR1</i> _Reverse                                              |                    | Borah et al.,2011 |
| OgRK129                                                                   | CGAGGAGGAAGACGACTACG                           | <i>CgCDR2</i> _Forward                                              |                    | Borah et al.,2011 |
| OgRK130                                                                   | GCAGGTTACGGAAGTGCTC                            | <i>CgCDR2</i> _Reverse                                              |                    | Borah et al.,2011 |
| OgRK131                                                                   | ACGACCAATCAATGCAACAA                           | <i>CgSNQ2</i> _Forward                                              |                    | Borah et al.,2011 |
| OgRK132                                                                   | ACACCACCTCTGGAAAATGC                           | <i>CgSNQ2</i> _Reverse                                              |                    | Borah et al.,2011 |
| OgRK133                                                                   | ACGGTACCAAGCCATACGAG                           | <i>CgERG11</i> _Forward                                             |                    | Borah et al.,2011 |
| OgRK134                                                                   | GAACACTGGGGTGGTCAAGT                           | <i>CgERG11</i> _Reverse                                             |                    | Borah et al.,2011 |
| OgRK135                                                                   | AAAGGGAGTGACAGCGAGAA                           | <i>CgPDR1</i> _Forward                                              |                    | Borah et al.,2011 |
| OgRK136                                                                   | CTCAATGGCGTCAATGGATGA                          | <i>CgPDR1</i> _Reverse                                              |                    | Borah et al.,2011 |
| OgRK191                                                                   | TTTACAGAGTGCCAACCTGTCG                         | <i>CgTDH3</i> _Forward                                              |                    | Borah et al.,2011 |
| OgRK192                                                                   | TGAAACAACAGCGTCTCAG                            | <i>CgTDH3</i> _Reverse                                              |                    | Borah et al.,2011 |
| <b>For amplification of nat1 cassette for C. glabrata gene disruption</b> |                                                |                                                                     |                    |                   |
| OGRK340                                                                   | cgtagcctgcaggtcgagcctTTCGCTGCTAGGCGCCCGTG      | 5' NAT half_Forward                                                 |                    | Kaur Laboratory   |
| OGRK343                                                                   | TCTGTTCACCAAGATAAG                             | 5' NAT half_Reverse                                                 |                    | Kaur Laboratory   |
| OGRK342                                                                   | GTCTACTACTTTGGATGATAC                          | 3' NAT half_Forward                                                 |                    | Kaur Laboratory   |
| OGRK341                                                                   | ctacgagaccgacacctgctGGCCGCTGACGAAGT            | 3' NAT half_Reverse                                                 |                    | Kaur Laboratory   |
| OGRK344                                                                   | TGGCAGCTCAAGACTGTCAAGG                         | 5' integration check_Forward                                        |                    | Kaur Laboratory   |
| OGRK345                                                                   | TGTGAATGCTGGTCTACTACTGC                        | 3' integration check_Reverse                                        |                    | Kaur Laboratory   |

# Nucleotide sequences written in small case letters represent overhangs.

\* The underlined sequences correspond to cleavage sites of restriction enzymes.

**Table S6 : List of antibodies used in the study.**

| <b>Name</b>                 | <b>Dilution used</b> | <b>Clonality</b> | <b>Company</b>            | <b>Catalog number</b> |
|-----------------------------|----------------------|------------------|---------------------------|-----------------------|
| <b>Primary antibodies</b>   |                      |                  |                           |                       |
| Anti-histone H3             | 1:5,000              | Polyclonal       | Abcam                     | ab1791                |
| Anti-histone H4             | 1:5,000              | Polyclonal       | Abcam                     | ab10158               |
| Anti-H3K36me3               | 1:5,000              | Polyclonal       | Abcam                     | ab9050                |
| Anti-GAPDH                  | 1:10,000             | Polyclonal       | Abcam                     | ab22555               |
| Anti-GFP                    | 1:10,000             | Polyclonal       | Abcam                     | ab290                 |
| <b>Secondary antibodies</b> |                      |                  |                           |                       |
| Anti-rabbit                 | 1:10,000             |                  | Cell Signaling Technology | 7076S                 |

## References

1. Cormack BP, Falkow S. 1999. Efficient homologous and illegitimate recombination in the opportunistic yeast pathogen *Candida glabrata*. *Genetics* 151:979–987.
2. De Las Peñas A, Pan SJ, Castaño I, Alder J, Cregg R, Cormack BP. 2003. Virulence-related surface glycoproteins in the yeast pathogen *Candida glabrata* are encoded in subtelomeric clusters and subject to RAPI- and SIR-dependent transcriptional silencing. *Genes Dev* 17:2245-58.
3. Borah S, Shivarathri R, Kaur R. 2011. The Rho1 GTPase-activating protein CgBem2 is required for survival of azole stress in *Candida glabrata*. *J Biol Chem* 286:34311–34324.



**Figure S1**

**A**

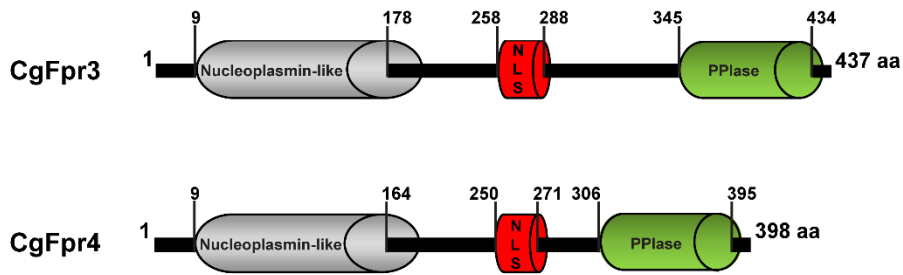

**B**

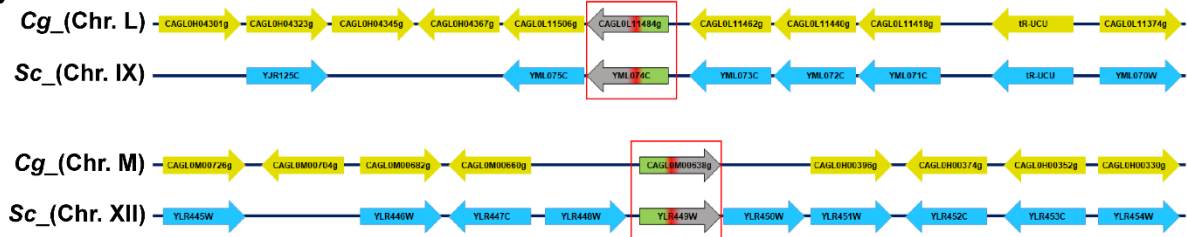

**C**

|              | <i>Candida glabrata</i>  |                          | <i>Saccharomyces cerevisiae</i> |                   |
|--------------|--------------------------|--------------------------|---------------------------------|-------------------|
|              | Cagl0L11484p<br>(CgFpr3) | Cagl0M00638p<br>(CgFpr4) | YML074C<br>(Fpr3)               | YLR449W<br>(Fpr4) |
| Cagl0L11484p | 100                      | 80                       | 84.21                           | 83.93             |
| Cagl0M00638p | 80                       | 100                      | 73.38                           | 80.34             |

**Figure S1: CgFpr3 and CgFpr4 possess peptidyl-prolyl cis-trans isomerase domain.**

- A. A schematic illustration of domains, as predicted by the Pfam tool (<http://pfam.xfam.org>), in CgFpr4 and CgFpr3 proteins. The nucleoplasmin-like domain and the PPIase (peptidyl-prolyl cis/trans isomerase) domains were identified at the C- and the N-termini, respectively, of CgFpr3 and CgFpr4 proteins. The NLS mapper tool (<http://nls-mapper.iab.keio.ac.jp>) predicted one bipartite nuclear localization signal (NLS) in the middle region of both proteins. The NLS region was marked based on the maximum score obtained by the NLS mapper tool. The FKBP\_C peptidyl-prolyl cis-trans isomerase domain spanned 89 amino acids at the C-terminal region of proteins.
- B. A schematic depicting syntenic nature of the *FPR3* and *FPR4* gene loci in *C. glabrata* and *S. cerevisiae* that share 77% identity with each other at the nucleotide level. The YGOB tool (<http://ygob.ucd.ie>) was used to determine the synteny between genomic regions of *C. glabrata* and *S. cerevisiae* that contain *FPR3* and *FPR4* ORFs. *C. glabrata* and *S. cerevisiae* CgFpr3- and CgFpr4 -encoding ORFs are marked in red-colored boxes, with color-coded individual domain-encoding sequences.
- C. A summary table of amino acid sequence similarity between *C. glabrata* and *S. cerevisiae* Fpr3 and Fpr4 proteins. Sequence homology among proteins was determined using BLASTP analysis, after retrieving protein sequences of Fpr3 and Fpr4 of *C. glabrata* and *S. cerevisiae* from Candida Genome Database (CGD) and Saccharomyces Genome Database (SGD) respectively. *C. glabrata* Fpr3 and Fpr4 were used as a query sequence for the BLASTP analysis.

**Figure S2**

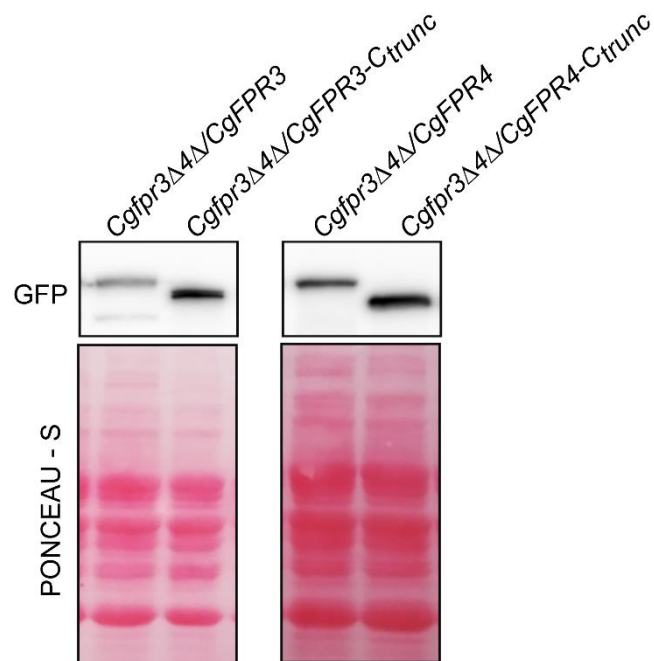

**Figure S2: CgFpr3-C<sub>trunc</sub>-GFP and CgFpr4-C<sub>trunc</sub>-GFP proteins are expressed well in the *Cgpr3Δ4Δ* mutant.** An immunoblot showing expression of GFP-tagged full-length and C-terminally-truncated CgFpr3 and CgFpr4 proteins, that lack PPIase domain. The *Cgpr3Δ4Δ* mutant expressing full length or truncated CgFpr3 and CgFpr4 proteins was grown in CAA medium for 4 h at 30°C. These log-phase cells were harvested and whole-cell extracts were prepared by glass bead lysis. 50 μg protein were resolved on 15% SDS-PAGE and probed with anti-GFP antibody. The bands of approximately 95 kDa for *Cgpr3Δ4Δ/CgFPR3-GFP*, 85 kDa for *Cgpr3Δ4Δ/CgFPR3-Ctrunc-GFP*, 90 kDa for *Cgpr3Δ4Δ/CgFPR4-GFP* and 80 kDa for *Cgpr3Δ4Δ/CgFPR4-Ctrunc-GFP* were observed. Ponceau S-stained membrane was used as loading control.

**Figure S3**

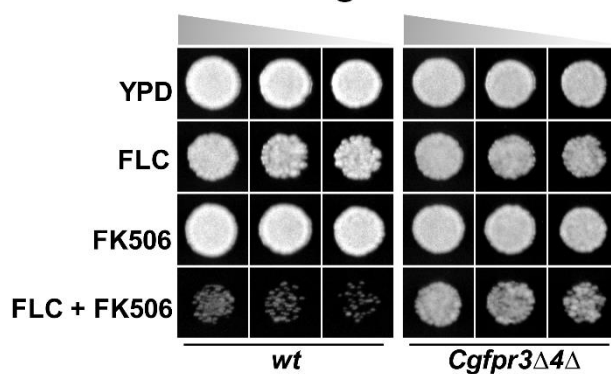

**Figure S3: Fluconazole and FK506 combination is not cidal for *Cgfr3ΔΔ* mutant.**

Liquid medium-based growth analysis of indicated *C. glabrata* strains to assess the sensitivity towards the combinatorial treatment with fluconazole and FK506. Wild-type (*wt*) and *Cgfr3ΔΔ* strains were grown in YPD medium lacking (YPD) or containing fluconazole (FLC; 128  $\mu\text{g/ml}$ ), FK506 (2  $\mu\text{g/ml}$ ) or fluconazole (128  $\mu\text{g/ml}$ ) plus FK506 (2  $\mu\text{g/ml}$ ) [FLC+FK506] at 30°C. After 24 h incubation, cultures were diluted in PBS, and 3  $\mu\text{l}$  of 100-, 250- and 500-fold diluted cultures were spotted on YPD medium. Images were captured after 1 day of growth at 30°C.

**Figure S4**

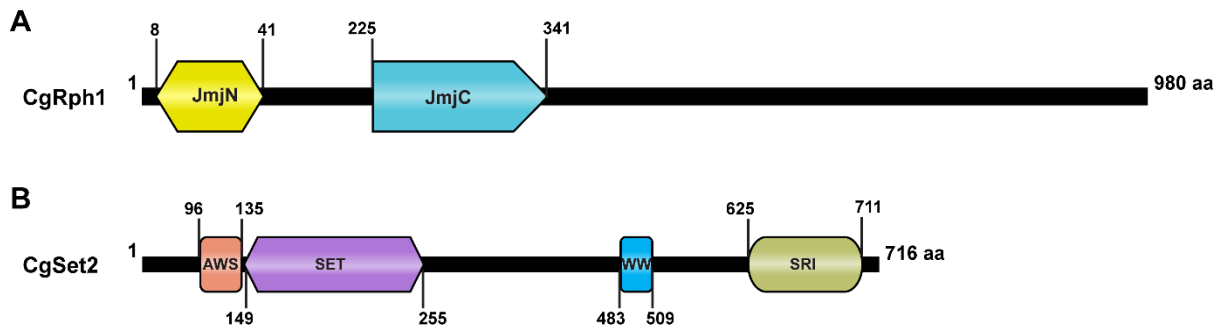

**Figure S4: CgRph1 contains JmjN and JmjC domains at the N-terminus.**

- A. Schematic depiction of the domain composition of the CgRph1 protein, as predicted by the pfam tool. While the JmjC domain is known to function in the highly conserved histone demethylation mechanism, the JmjN and JmjC domains as two non-adjacent domains have often been found in the jumonji family of transcription factors.
- B. Schematic depiction of the domain organization of the CgSet2 protein, as predicted by the pfam tool. The SET domain is a characteristic feature of protein lysine methyltransferase enzymes, while AWS and SRI domains refer to Associated with SET domain and Set2-Rpb1 interacting domain, respectively. The WW domain containing two signature tryptophan residues is implicated in binding to proline-rich motifs and mediate protein-protein interaction.

**Figure S5**

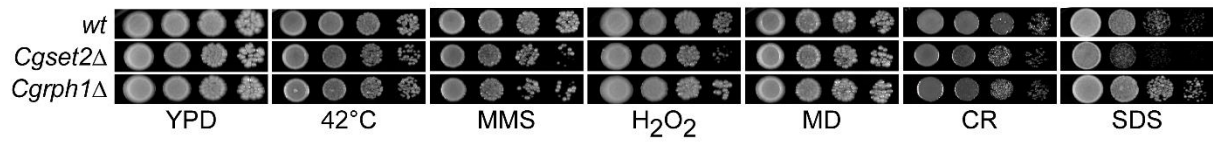

**Figure S5: Serial dilution spotting analysis illustrating susceptibility of *Cgset2Δ* and *Cgrph1Δ* to varied stresses.** Methyl methane sulfonate (MMS), hydrogen peroxide (H<sub>2</sub>O<sub>2</sub>), menadione (MD), congo red (CR) and sodium dodecyl sulfate (SDS) were used at a concentration of 0.03%, 25 mM, 100 μM, 2 mg/ml and 0.05%, respectively. All plates were incubated at 30°C, unless indicated otherwise. Images were captured after 1-2 days of incubation.
